# Supplementary material
Source: Springer Nature journal article supplement (https://www.springermedizin.de/resource/supplementary/12885_2011_2850_MOESM1_ESM.pdf/9462100)

R  
A  
N  
D  
O  
M  
I  
Z  
A  
T  
I  
O  
N

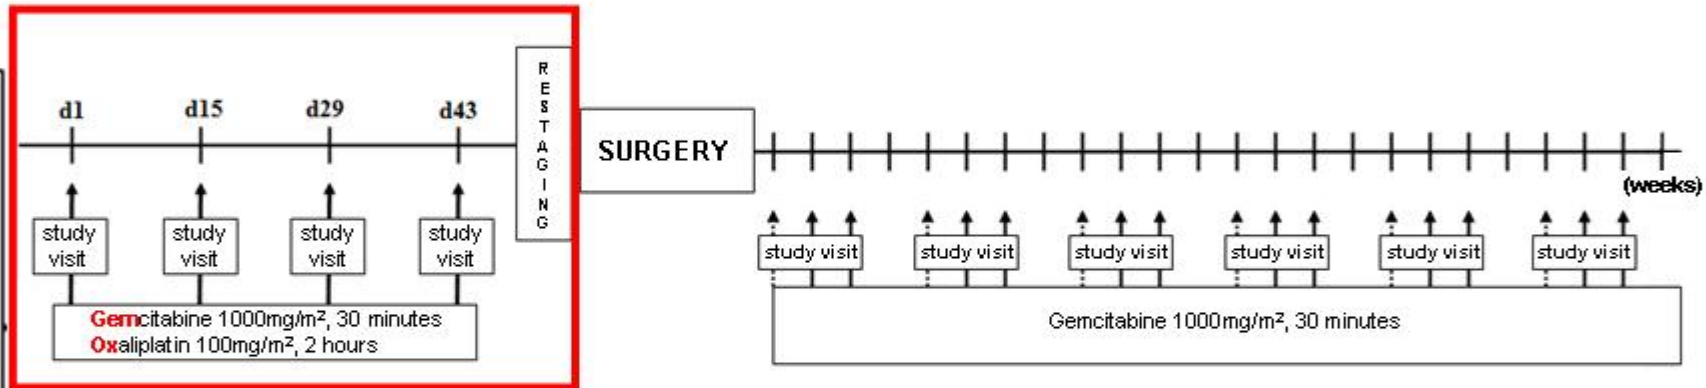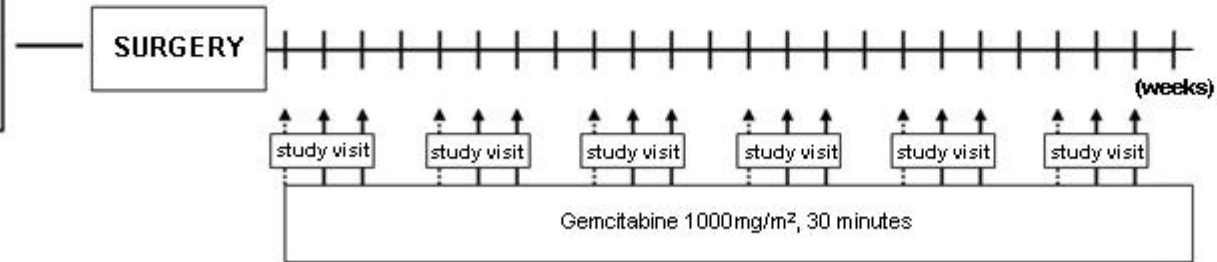

Supplement: MOESM1 [file 9462100]
